# Supplementary material for: Synthesis, structures and magnetic properties of polynuclear mixed-valence MnIIMnIII complexes containing 3-(2-phenol)-5-(pyridin-2-yl)-1,2,4-triazole ligand
Source: Royal Society of Chemistry journal article supplement (doi:10.1039/b904553h), 2009-01-01
Supplement: b904553h.pdf [file b904553h.pdf]

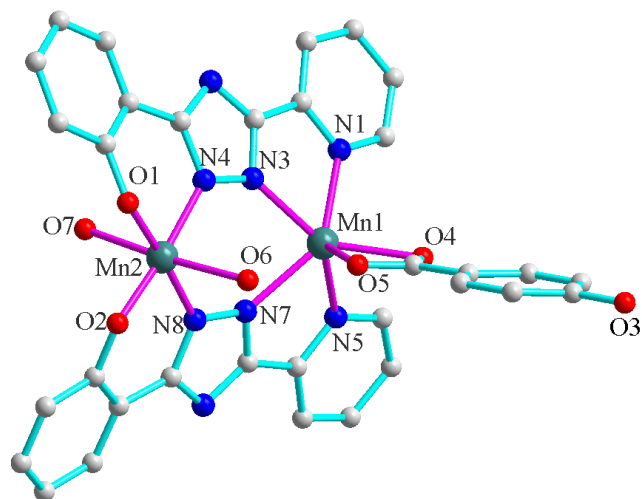

complex 2

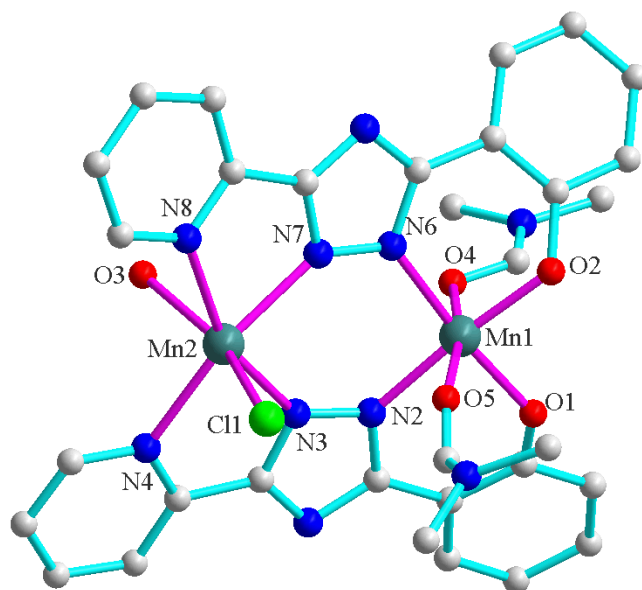

complex 3

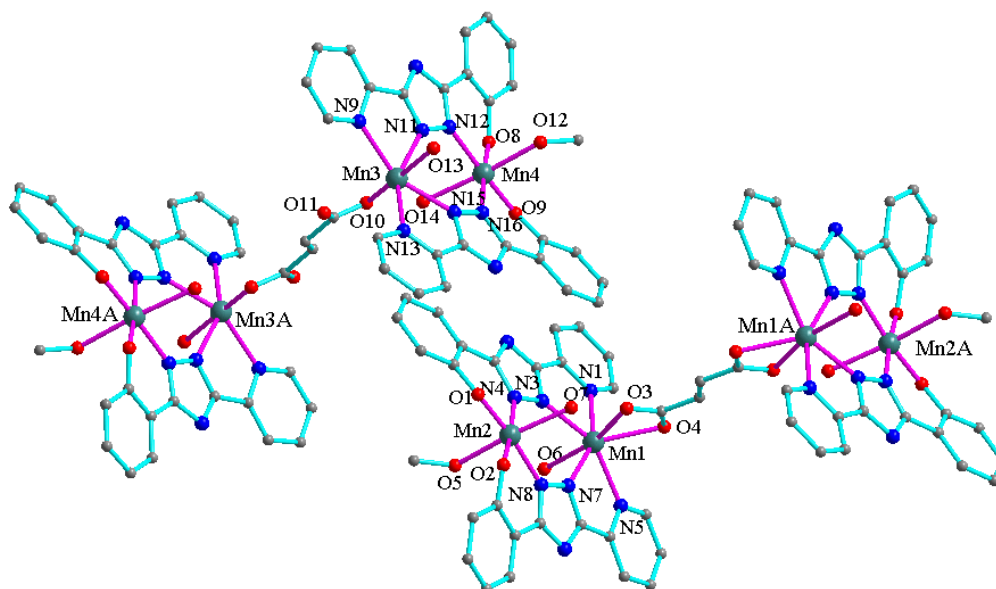

complex 4

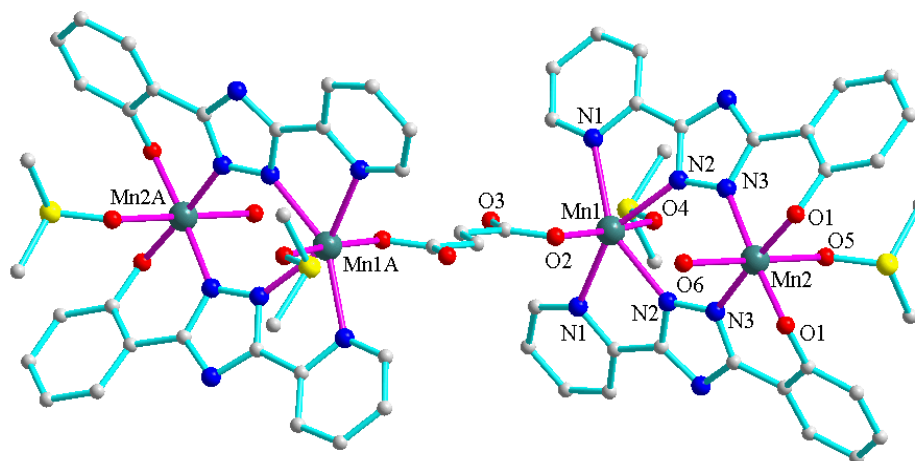

complex 5

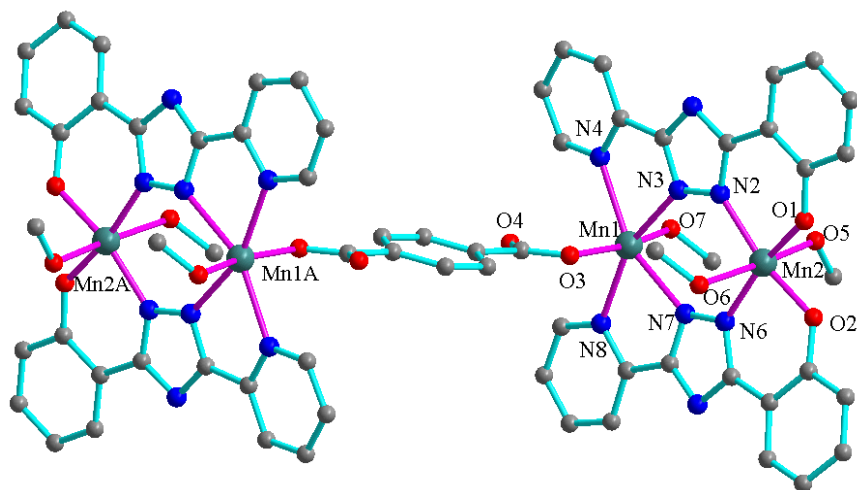

complex 6

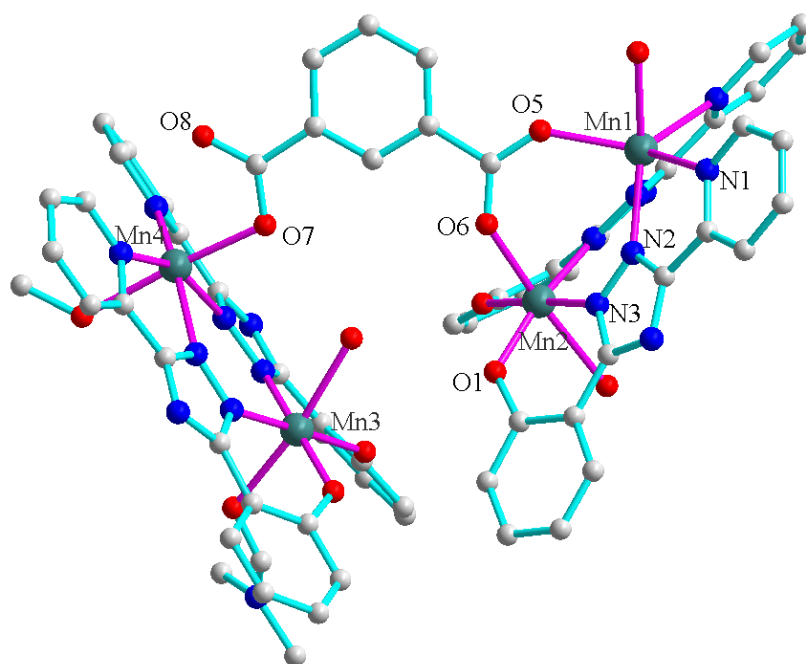

complex 7

Figure S1

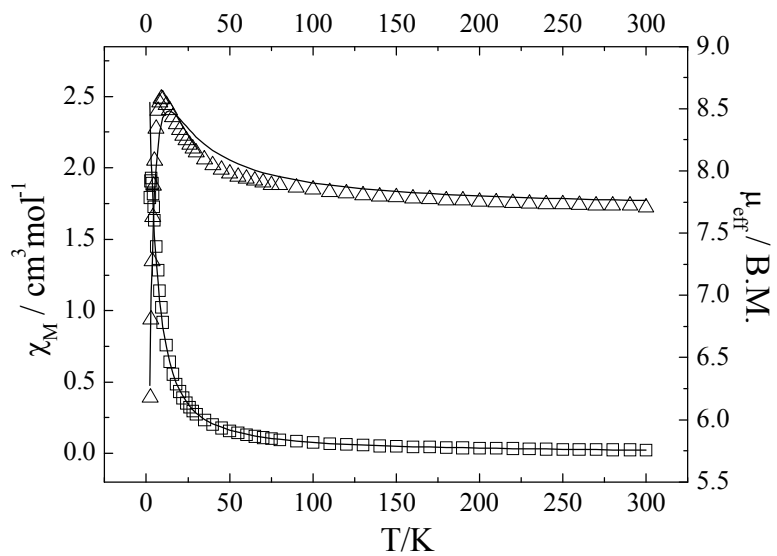

$$J = 1.17 \text{ cm}^{-1}, \quad g = 2.00, \quad zJ' = -0.13 \text{ cm}^{-1}, \quad R = 1.90 \times 10^{-3}$$

Complex 2

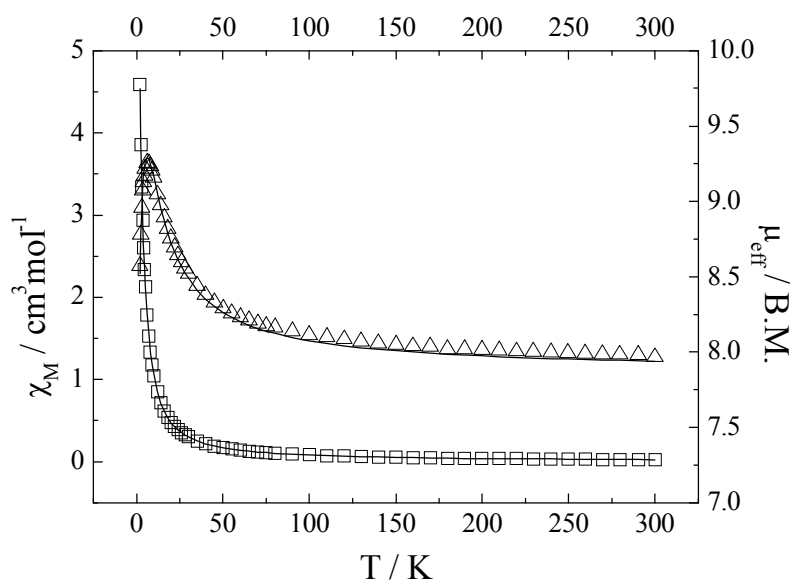

$$J = 0.86 \text{ cm}^{-1}, \quad zJ' = -3.63 \times 10^{-2} \text{ cm}^{-1}, \quad g = 2.05, \quad R = 6.24 \times 10^{-5}$$

Complex 3

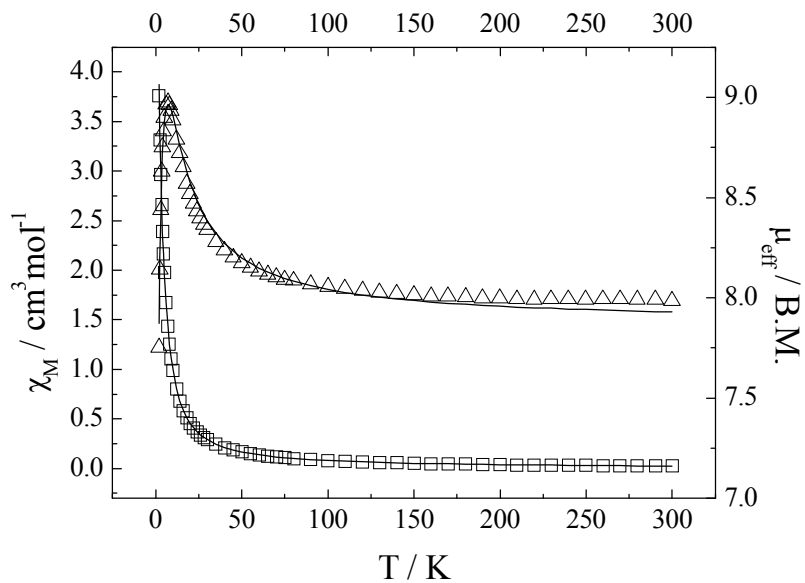

$$J = 0.78 \text{ cm}^{-1}, \quad g = 2.05, \quad zJ' = -5.69 \times 10^{-2} \text{ cm}^{-1}, \quad R = 2.58 \times 10^{-4}$$

Complex 4

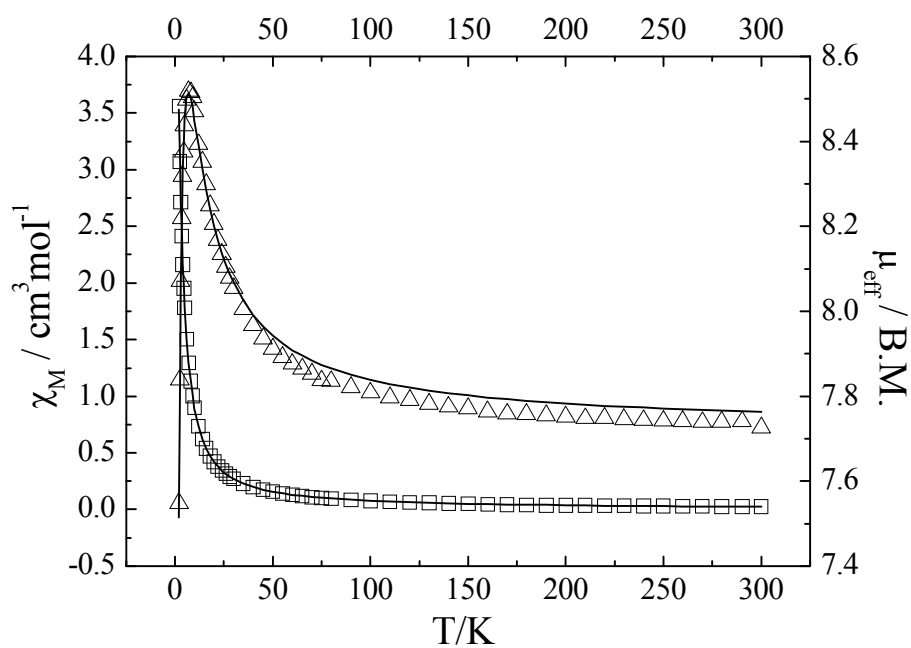

$$J = 0.58 \text{ cm}^{-1}, \quad g = 2.01, \quad zJ' = -6.46 \times 10^{-2} \text{ cm}^{-1}, \quad R = 2.61 \times 10^{-5}$$

Complex 5

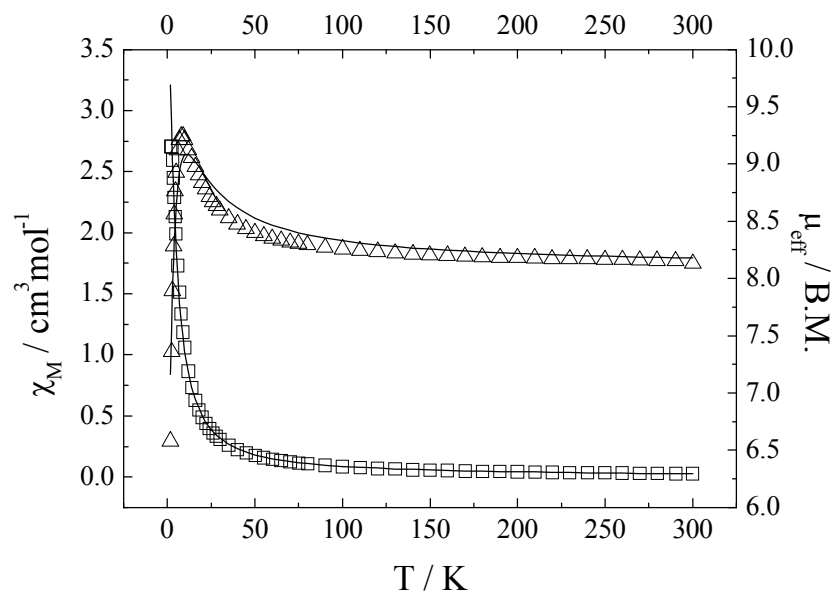

$$J = 1.08 \text{ cm}^{-1}, \quad g = 2.11, \quad zJ' = -9.65 \times 10^{-2} \text{ cm}^{-1}, \quad R = 6.63 \times 10^{-3}$$

Complex 6

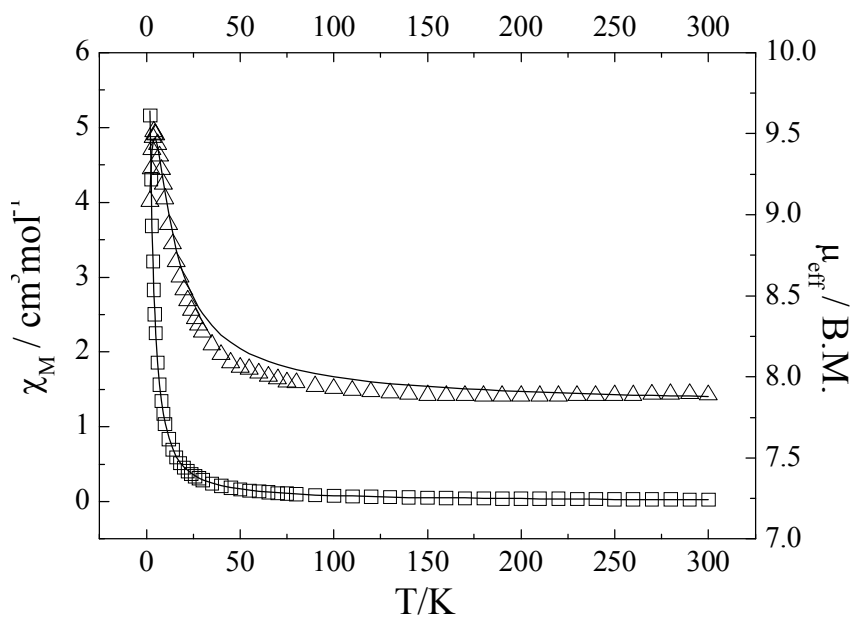

$$J = 0.75 \text{ cm}^{-1}, \quad g = 2.04, \quad zJ' = -1.90 \times 10^{-2} \text{ cm}^{-1}, \quad R = 6.62 \times 10^{-5}$$

Complex 7

Figure S2

**Table S1** Selected bond lengths (Å) and bond angles (°) for complex **2**

| <i>Bond lengths</i> |           |                    |           |
|---------------------|-----------|--------------------|-----------|
| Mn(1)-N ( 1 )       | 2.288(3)  | Mn(1)-N ( 5 )      | 2.281(2)  |
| Mn(1)-N ( 3 )       | 2.163(2)  | Mn(1)-N(7)         | 2.198(2)  |
| Mn(1)-O ( 4 )       | 2.177(2)  | Mn(1)-O ( 5 )      | 2.287(2)  |
| Mn(2)-O ( 1 )       | 1.903(2)  | Mn(2)-O ( 2 )      | 1.870(2)  |
| Mn(2)-N ( 4 )       | 2.002(2)  | Mn(2)-N ( 8 )      | 2.013(2)  |
| Mn(2)-O ( 6 )       | 2.273(2)  | Mn(2)-O ( 7 )      | 2.232(2)  |
| <i>Bond angles</i>  |           |                    |           |
| N(3)-Mn(1)-O(4)     | 134.19(8) | N(3)-Mn(1)-N ( 7 ) | 82.45(9)  |
| O(4)-Mn(1)-N ( 7 )  | 128.18(9) | N(3)-Mn(1)-N ( 5 ) | 139.97(9) |
| O(4)-Mn(1)-N ( 5 )  | 85.44(8)  | N(7)-Mn(1)-N ( 5 ) | 73.08(8)  |
| N(3)-Mn(1)-O ( 5 )  | 92.08(8)  | O(4)-Mn(1)-O ( 5 ) | 59.00(7)  |
| N(7)-Mn(1)-O ( 5 )  | 91.18(8)  | N(5)-Mn(1)-O ( 5 ) | 119.04(9) |
| N(3)-Mn(1)-N ( 1 )  | 73.39(9)  | O(4)-Mn(1)-N ( 1 ) | 93.46(9)  |
| N(7)-Mn(1)-N ( 1 )  | 136.85(9) | N(5)-Mn(1)-N(1)    | 103.77(9) |
| O(5)-Mn(1)-N ( 1 )  | 124.24(8) | O(2)-Mn(2)-O ( 1 ) | 88.33(9)  |
| O(2)-Mn(2)-N ( 4 )  | 174.17(9) | O(1)-Mn(2)-N ( 4 ) | 86.18(9)  |
| O(2)-Mn(2)-N ( 8 )  | 87.42(9)  | O(1)-Mn(2)-N ( 8 ) | 175.75(9) |
| N(4)-Mn(2)-N ( 8 )  | 98.07(9)  | O(2)-Mn(2)-O ( 7 ) | 95.02(9)  |
| O(1)-Mn(2)-O ( 7 )  | 89.55(9)  | N(4)-Mn(2)-O ( 7 ) | 82.98(9)  |
| N(8)-Mn(2)-O ( 7 )  | 90.85(9)  | O(2)-Mn(2)-O ( 6 ) | 90.45(9)  |
| O(1)-Mn(2)-O ( 6 )  | 92.56(8)  | N(4)-Mn(2)-O ( 6 ) | 91.76(9)  |
| N(8)-Mn(2)-O ( 6 )  | 87.44(8)  | O(7)-Mn(2)-O ( 6 ) | 174.19(8) |

**Table S2** Selected bond lengths (Å) and bond angles (°) for complex **3**

| <i>Bond lengths</i> |            |                     |            |
|---------------------|------------|---------------------|------------|
| Mn(1)-O ( 1 )       | 1.882(3)   | Mn(1)-O ( 2 )       | 1.898(3)   |
| Mn(1)-N ( 2 )       | 2.007(3)   | Mn(1)-N ( 6 )       | 2.029(3)   |
| Mn(1)-O ( 4 )       | 2.285(3)   | Mn(1)-O(5)          | 2.223(6)   |
| Mn(2)-N ( 3 )       | 2.240(3)   | Mn(2)-N ( 7 )       | 2.179(3)   |
| Mn(2)-N ( 4 )       | 2.257(3)   | Mn(2)-N ( 8 )       | 2.294(3)   |
| Mn(2)-C1 ( 1 )      | 2.4402(13) | Mn(2)-O ( 3 )       | 2.260(3)   |
| <i>Bond angles</i>  |            |                     |            |
| O(1)-Mn(1)-O ( 2 )  | 87.10(11)  | O(1)-Mn(1)-N ( 2 )  | 87.67(12)  |
| O(2)-Mn(1)-N ( 2 )  | 174.76(12) | O(1)-Mn(1)-N ( 6 )  | 173.90(12) |
| O(2)-Mn(1)-N ( 6 )  | 86.81(12)  | N(2)-Mn(1)-N ( 6 )  | 98.41(13)  |
| O(1)-Mn(1)-O ( 5 )  | 93.3(2)    | O(2)-Mn(1)-O(5)     | 99.0(2)    |
| N(2)-Mn(1)-O ( 5 )  | 81.0(2)    | N(6)-Mn(1)-O ( 5 )  | 87.3(2)    |
| O(1)-Mn(1)-O ( 4 )  | 88.73(10)  | O(2)-Mn(1)-O ( 4 )  | 91.43(11)  |
| N(2)-Mn(1)-O ( 4 )  | 88.80(11)  | N(6)-Mn(1)-O ( 4 )  | 91.79(11)  |
| O(5)-Mn(1)-O ( 4 )  | 169.5(2)   | N(7)-Mn(2)-N ( 3 )  | 85.16(12)  |
| N(7)-Mn(2)-N ( 4 )  | 155.74(12) | N(3)-Mn(2)-N ( 4 )  | 72.97(11)  |
| N(7)-Mn(2)-O ( 3 )  | 91.61(12)  | N(3)-Mn(2)-O ( 3 )  | 99.17(13)  |
| N(4)-Mn(2)-O ( 3 )  | 81.88(11)  | N(7)-Mn(2)-N ( 8 )  | 73.39(11)  |
| N(3)-Mn(2)-N ( 8 )  | 158.43(12) | N(4)-Mn(2)-N ( 8 )  | 127.51(12) |
| O(3)-Mn(2)-N ( 8 )  | 79.52(12)  | N(7)-Mn(2)-C1 ( 1 ) | 101.62(9)  |
| N(3)-Mn(2)-C1(1)    | 97.37(9)   | N(4)-Mn(2)-C1 ( 1 ) | 91.69(9)   |
| O(3)-Mn(2)-C1 ( 1 ) | 159.60(11) | N(8)-Mn(2)-C1 ( 1 ) | 89.38(9)   |



**Table S3** Selected bond lengths (Å) and bond angles (°) for complex **4**

| <i>Bond lengths</i>   |            |                       |            |
|-----------------------|------------|-----------------------|------------|
| Mn(1)-N ( 3 )         | 2.224(3)   | Mn(1)-N ( 7 )         | 2.221(3)   |
| Mn(1)-N ( 1 )         | 2.287(3)   | Mn(1)-N ( 5 )         | 2.299(3)   |
| Mn(1)-O ( 3 )         | 2.340(3)   | Mn(1)-O ( 4 )         | 2.347(3)   |
| Mn(1)-O ( 6 )         | 2.356(3)   |                       |            |
| Mn(2)-O ( 1 )         | 1.881(3)   | Mn(2)-O ( 2 )         | 1.884(3)   |
| Mn(2)-N ( 4 )         | 2.015(3)   | Mn(2)-N ( 8 )         | 2.023(3)   |
| Mn(2)-O ( 5 )         | 2.259(3)   | Mn(2)-O ( 7 )         | 2.261(3)   |
| Mn(3)-N ( 1 1 )       | 2.233(3)   | Mn(3)-N ( 1 5 )       | 2.229(3)   |
| Mn(3)-N ( 9 )         | 2.260(3)   | Mn(3)-N ( 1 3 )       | 2.264(3)   |
| Mn(3)-O ( 1 0 )       | 2.197(3)   | Mn(3)-O ( 1 3 )       | 2.333(3)   |
| Mn(4)-N ( 1 2 )       | 2.026(3)   | Mn(4)-N ( 1 6 )       | 2.018(3)   |
| Mn(4)-O ( 8 )         | 1.888(3)   | Mn(4)-O ( 9 )         | 1.880(3)   |
| Mn(4)-O ( 1 2 )       | 2.256(3)   | Mn(4)-O ( 1 4 )       | 2.293(3)   |
| <i>Bond angles</i>    |            |                       |            |
| N(7)-Mn(1)-N ( 3 )    | 85.42(12)  | N(7)-Mn(1)-N ( 1 )    | 154.94(12) |
| N(3)-Mn(1)-N ( 1 )    | 73.21(12)  | N(7)-Mn(1)-N ( 5 )    | 72.68(12)  |
| N(3)-Mn(1)-N ( 5 )    | 151.99(12) | N(1)-Mn(1)-N ( 5 )    | 122.39(12) |
| N(7)-Mn(1)-O ( 3 )    | 88.18(11)  | N(3)-Mn(1)-O ( 3 )    | 82.26(11)  |
| N(1)-Mn(1)-O ( 3 )    | 101.42(11) | N(5)-Mn(1)-O ( 3 )    | 113.47(11) |
| N(7)-Mn(1)-O ( 4 )    | 119.72(11) | N(3)-Mn(1)-O ( 4 )    | 127.43(11) |
| N(1)-Mn(1)-O ( 4 )    | 84.33(11)  | N(5)-Mn(1)-O ( 4 )    | 79.58(11)  |
| O(3)-Mn(1)-O ( 4 )    | 56.09(10)  | N(7)-Mn(1)-O ( 6 )    | 85.60(11)  |
| N(3)-Mn(1)-O ( 6 )    | 82.86(11)  | N(1)-Mn(1)-O ( 6 )    | 79.02(11)  |
| N(5)-Mn(1)-O ( 6 )    | 78.34(11)  | O(3)-Mn(1)-O ( 6 )    | 164.28(10) |
| O(4)-Mn(1)-O ( 6 )    | 138.96(10) | O(1)-Mn(2)-O ( 2 )    | 85.17(12)  |
| O(1)-Mn(2)-N ( 4 )    | 87.66(12)  | O(2)-Mn(2)-N ( 4 )    | 172.75(12) |
| O(1)-Mn(2)-N ( 8 )    | 171.09(13) | O(2)-Mn(2)-N ( 8 )    | 86.57(13)  |
| N(4)-Mn(2)-N ( 8 )    | 100.65(13) | O(1)-Mn(2)-O ( 5 )    | 92.36(12)  |
| O(2)-Mn(2)-O ( 5 )    | 91.81(12)  | N(4)-Mn(2)-O ( 5 )    | 89.53(13)  |
| N(8)-Mn(2)-O ( 5 )    | 84.56(13)  | O(1)-Mn(2)-O ( 7 )    | 95.46(12)  |
| O(2)-Mn(2)-O ( 7 )    | 94.46(12)  | N(4)-Mn(2)-O ( 7 )    | 85.17(12)  |
| N(8)-Mn(2)-O ( 7 )    | 88.50(12)  | O(5)-Mn(2)-O ( 7 )    | 170.35(11) |
| O(10)-Mn(3)-N ( 1 5 ) | 89.70(11)  | O(10)-Mn(3)-N(11)     | 85.58(11)  |
| N(15)-Mn(3)-N ( 1 1 ) | 83.75(12)  | O(10)-Mn(3)-N ( 9 )   | 100.82(11) |
| N(15)-Mn(3)-N ( 9 )   | 154.33(12) | N(11)-Mn(3)-N ( 9 )   | 73.92(12)  |
| O(10)-Mn(3)-N ( 1 3 ) | 107.89(11) | N(15)-Mn(3)-N ( 1 3 ) | 73.27(12)  |
| N(11)-Mn(3)-N ( 1 3 ) | 152.96(12) | N(9)-Mn(3)-N ( 1 3 )  | 123.98(12) |

---

|                       |            |                       |            |
|-----------------------|------------|-----------------------|------------|
| O(10)-Mn(3)-O ( 1 3 ) | 173.52(10) | N(15)-Mn(3)-O ( 1 3 ) | 88.08(11)  |
| N(11)-Mn(3)-O ( 1 3 ) | 88.12(11)  | N(9)-Mn(3)-O ( 1 3 )  | 78.85(11)  |
| N(13)-Mn(3)-O ( 1 3 ) | 77.27(11)  | O(9)-Mn(4)-O ( 8 )    | 85.78(12)  |
| O(9)-Mn(4)-N ( 1 6 )  | 86.81(13)  | O(8)-Mn(4)-N ( 1 6 )  | 172.59(13) |
| O(9)-Mn(4)-N ( 1 2 )  | 173.31(13) | O(8)-Mn(4)-N ( 1 2 )  | 87.55(13)  |
| N(16)-Mn(4)-N ( 1 2 ) | 99.86(13)  | O(9)-Mn(4)-O ( 1 2 )  | 91.03(12)  |
| O(8)-Mn(4)-O ( 1 2 )  | 88.53(12)  | N(16)-Mn(4)-O ( 1 2 ) | 91.77(13)  |
| N(12)-Mn(4)-O ( 1 2 ) | 89.29(12)  | O(9)-Mn(4)-O ( 1 4 )  | 92.95(12)  |
| O(8)-Mn(4)-O(14)      | 91.37(12)  | N(16)-Mn(4)-O ( 1 4 ) | 88.85(12)  |
| N(12)-Mn(4)-O ( 1 4 ) | 86.71(12)  | O(12)-Mn(4)-O ( 1 4 ) | 176.00(11) |

---

**Table S4** Selected bond lengths (Å) and bond angles (°) for complex **5**

| <i>Bond lengths</i>  |            |                        |            |
|----------------------|------------|------------------------|------------|
| Mn(1)-N ( 1 )        | 2.305(3)   | Mn(1)-N ( 1 ) # 1      | 2.305(3)   |
| Mn(1)-N ( 2 )        | 2.229(2)   | Mn(1)-N ( 2 ) # 1      | 2.229(2)   |
| Mn(1)-O ( 2 )        | 2.142(3)   | Mn(1)-O ( 4 )          | 2.315(3)   |
| Mn(2)-O ( 1 )        | 1.887(2)   | Mn(2)-O ( 1 ) # 1      | 1.887(2)   |
| Mn(2)-N ( 3 )        | 2.017(2)   | Mn(2)-N ( 3 ) # 1      | 2.017(2)   |
| Mn(2)-O ( 5 )        | 2.237(3)   | Mn(2)-O ( 6 )          | 2.238(4)   |
| <i>Bond angles</i>   |            |                        |            |
| O(2)-Mn(1)-N ( 2 )   | 99.95(9)   | N(2)#1-Mn(1)-N ( 2 )   | 83.04(12)  |
| O(2)-Mn(1)-N ( 1 )   | 97.80(7)   | N(2)#1-Mn(1)-N ( 1 )   | 152.38(9)  |
| N(2)-Mn(1)-N ( 1 )   | 73.14(9)   | N(1)-Mn(1)-N ( 1 ) # 1 | 125.01(13) |
| O(2)-Mn(1)-O(4)      | 168.20(11) | N(2)-Mn(1)-O ( 4 )     | 88.84(8)   |
| N(1)-Mn(1)-O ( 4 )   | 77.11(7)   | O(1)#1-Mn(2)-O ( 1 )   | 91.26(13)  |
| O(1)-Mn(2)-N ( 3 )   | 86.46(9)   | O(1)-Mn(2)-N ( 3 ) # 1 | 176.55(10) |
| N(3)#1-Mn(2)-N ( 3 ) | 95.70(13)  | O(1)-Mn(2)-O ( 5 )     | 89.42(8)   |
| N(3)-Mn(2)-O ( 5 )   | 87.97(8)   | O(1)-Mn(2)-O ( 6 )     | 90.84(10)  |
| N(3)-Mn(2)-O ( 6 )   | 91.78(10)  | O(5)-Mn(2)-O ( 6 )     | 179.62(14) |

**Table S5** Selected bond lengths (Å) and bond angles (°) for complex **6**

| <i>Bond lengths</i> |            |                    |            |
|---------------------|------------|--------------------|------------|
| Mn(1)-N ( 3 )       | 2.237(3)   | Mn(1)-N ( 7 )      | 2.255(3)   |
| Mn(1)-N ( 4 )       | 2.303(4)   | Mn(1)-N ( 8 )      | 2.308(4)   |
| Mn(1)-O ( 3 )       | 2.128(3)   | Mn(1)-O ( 7 )      | 2.226(3)   |
| Mn(2)-N ( 2 )       | 2.028(3)   | Mn(2)-N ( 6 )      | 2.020(3)   |
| Mn(2)-O ( 1 )       | 1.858(3)   | Mn(2)-O ( 2 )      | 1.883(3)   |
| Mn(2)-O ( 5 )       | 2.272(4)   | Mn(2)-O ( 6 )      | 2.264(3)   |
| <i>Bond angles</i>  |            |                    |            |
| O(3)-Mn(1)-O ( 7 )  | 164.77(12) | O(3)-Mn(1)-N ( 3 ) | 91.12(13)  |
| O(7)-Mn(1)-N ( 3 )  | 98.10(12)  | O(3)-Mn(1)-N ( 7 ) | 97.60(12)  |
| O(7)-Mn(1)-N ( 7 )  | 94.93(12)  | N(3)-Mn(1)-N ( 7 ) | 87.29(12)  |
| O(3)-Mn(1)-N ( 4 )  | 91.68(12)  | O(7)-Mn(1)-N ( 4 ) | 79.62(11)  |
| N(3)-Mn(1)-N ( 4 )  | 72.80(12)  | N(7)-Mn(1)-N ( 4 ) | 158.21(12) |
| O(3)-Mn(1)-N ( 8 )  | 93.00(13)  | O(7)-Mn(1)-N ( 8 ) | 82.57(12)  |
| N(3)-Mn(1)-N ( 8 )  | 159.62(12) | N(7)-Mn(1)-N ( 8 ) | 72.39(12)  |
| N(4)-Mn(1)-N ( 8 )  | 126.96(12) | O(1)-Mn(2)-O ( 2 ) | 82.80(14)  |
| O(1)-Mn(2)-N ( 6 )  | 168.30(13) | O(2)-Mn(2)-N ( 6 ) | 86.16(14)  |
| O(1)-Mn(2)-N ( 2 )  | 87.46(13)  | O(2)-Mn(2)-N ( 2 ) | 169.14(13) |
| N(6)-Mn(2)-N ( 2 )  | 103.86(13) | O(1)-Mn(2)-O ( 6 ) | 94.59(15)  |
| O(2)-Mn(2)-O ( 6 )  | 96.64(15)  | N(6)-Mn(2)-O ( 6 ) | 82.86(13)  |
| N(2)-Mn(2)-O ( 6 )  | 88.88(13)  | O(1)-Mn(2)-O ( 5 ) | 93.35(16)  |
| O(2)-Mn(2)-O ( 5 )  | 89.59(15)  | N(6)-Mn(2)-O ( 5 ) | 90.40(14)  |
| N(2)-Mn(2)-O ( 5 )  | 86.19(13)  | O(6)-Mn(2)-O ( 5 ) | 170.46(13) |

**Table S6** Selected bond lengths (Å) and bond angles (°) for complex 7

| <i>Bond lengths</i>   |            |                       |            |
|-----------------------|------------|-----------------------|------------|
| Mn(1)-N ( 1 )         | 2.338(3)   | Mn(1)-N ( 5 )         | 2.385(3)   |
| Mn(1)-N ( 2 )         | 2.206(3)   | Mn(1)-N ( 6 )         | 2.217(3)   |
| Mn(1)-O ( 5 )         | 2.121(3)   | Mn(1)-O ( 3 )         | 2.207(3)   |
| Mn(2)-O ( 1 )         | 1.864(2)   | Mn(2)-O ( 2 )         | 1.904(2)   |
| Mn(2)-N ( 3 )         | 1.989(3)   | Mn(2)-N ( 7 )         | 1.993(3)   |
| Mn(2)-O(6)            | 2.125(3)   | Mn(2)-O ( 4 )         | 2.449(3)   |
| Mn(3)-O ( 9 )         | 1.895(2)   | Mn(3)-O ( 1 0 )       | 1.890(3)   |
| Mn(3)-N ( 1 1 )       | 1.996(3)   | Mn(3)-N ( 1 5 )       | 2.031(3)   |
| Mn(3)-O ( 1 1 )       | 2.303(2)   | Mn(3)-O ( 1 3 )       | 2.280(3)   |
| Mn(4)-N ( 9 )         | 2.245(3)   | Mn(4)-N ( 1 3 )       | 2.267(3)   |
| Mn(4)-N ( 1 0 )       | 2.195(3)   | Mn(4)-N ( 1 4 )       | 2.219(3)   |
| Mn(4)-O ( 7 )         | 2.138(2)   | Mn(4)-O ( 1 2 )       | 2.295(2)   |
| O(5)-C ( 2 7 )        | 1.256(4)   | O(6)-C ( 2 7 )        | 1.254(4)   |
| O(7)-C ( 3 4 )        | 1.275(4)   | O(8)-C ( 3 4 )        | 1.251(4)   |
| <i>Bond angles</i>    |            |                       |            |
| O(5)-Mn(1)-N ( 2 )    | 97.11(11)  | O(5)-Mn(1)-O ( 3 )    | 81.21(11)  |
| N(2)-Mn(1)-O ( 3 )    | 139.70(11) | O(5)-Mn(1)-N ( 6 )    | 87.11(12)  |
| N(2)-Mn(1)-N ( 6 )    | 79.21(11)  | O(3)-Mn(1)-N ( 6 )    | 140.29(11) |
| O(5)-Mn(1)-N ( 1 )    | 132.96(11) | N(2)-Mn(1)-N ( 1 )    | 70.70(11)  |
| O(3)-Mn(1)-N ( 1 )    | 81.17(11)  | N(6)-Mn(1)-N ( 1 )    | 131.34(11) |
| O(5)-Mn(1)-N ( 5 )    | 119.68(11) | N(2)-Mn(1)-N ( 5 )    | 128.93(11) |
| O(3)-Mn(1)-N ( 5 )    | 83.71(11)  | N(6)-Mn(1)-N(5)       | 69.50(11)  |
| N(1)-Mn(1)-N ( 5 )    | 101.19(10) | O(1)-Mn(2)-O ( 2 )    | 89.66(10)  |
| O(1)-Mn(2)-N ( 3 )    | 87.36(11)  | O(2)-Mn(2)-N ( 3 )    | 176.59(11) |
| O(1)-Mn(2)-N ( 7 )    | 168.33(12) | O(2)-Mn(2)-N ( 7 )    | 86.99(11)  |
| N(3)-Mn(2)-N ( 7 )    | 95.61(12)  | O(1)-Mn(2)-O ( 6 )    | 99.66(11)  |
| O(2)-Mn(2)-O ( 6 )    | 93.13(10)  | N(3)-Mn(2)-O ( 6 )    | 89.02(11)  |
| N(7)-Mn(2)-O ( 6 )    | 91.69(12)  | O(1)-Mn(2)-O ( 4 )    | 83.32(10)  |
| O(2)-Mn(2)-O ( 4 )    | 89.96(10)  | N(3)-Mn(2)-O ( 4 )    | 88.04(11)  |
| N(7)-Mn(2)-O ( 4 )    | 85.50(11)  | O(6)-Mn(2)-O ( 4 )    | 175.71(9)  |
| O(10)-Mn(3)-O ( 9 )   | 86.84(10)  | O(10)-Mn(3)-N ( 1 1 ) | 173.87(10) |
| O(9)-Mn(3)-N ( 1 1 )  | 87.47(11)  | O(10)-Mn(3)-N ( 1 5 ) | 86.39(11)  |
| O(9)-Mn(3)-N ( 1 5 )  | 172.14(11) | N(11)-Mn(3)-N ( 1 5 ) | 99.45(11)  |
| O(10)-Mn(3)-O ( 1 3 ) | 89.38(10)  | O(9)-Mn(3)-O ( 1 3 )  | 90.69(10)  |
| N(11)-Mn(3)-O(13)     | 92.97(10)  | N(15)-Mn(3)-O ( 1 3 ) | 85.25(10)  |
| O(10)-Mn(3)-O ( 1 1 ) | 92.18(10)  | O(9)-Mn(3)-O ( 1 1 )  | 99.14(10)  |

---

|                       |            |                       |            |
|-----------------------|------------|-----------------------|------------|
| N(11)-Mn(3)-O ( 1 1 ) | 86.48(11)  | N(15)-Mn(3)-O ( 1 1 ) | 85.11(10)  |
| O(13)-Mn(3)-O ( 1 1 ) | 170.11(9)  | O(7)-Mn(4)-N ( 1 0 )  | 89.60(10)  |
| O(7)-Mn(4)-N ( 1 4 )  | 92.04(10)  | N(10)-Mn(4)-N ( 1 4 ) | 84.92(11)  |
| O(7)-Mn(4)-N ( 9 )    | 96.63(10)  | N(10)-Mn(4)-N ( 9 )   | 74.62(11)  |
| N(14)-Mn(4)-N ( 9 )   | 157.66(10) | O(7)-Mn(4)-N ( 1 3 )  | 101.79(10) |
| N(10)-Mn(4)-N ( 1 3 ) | 155.67(11) | N(14)-Mn(4)-N ( 1 3 ) | 73.37(10)  |
| N(9)-Mn(4)-N ( 1 3 )  | 124.34(11) | O(7)-Mn(4)-O ( 1 2 )  | 176.36(9)  |
| N(10)-Mn(4)-O ( 1 2 ) | 87.13(10)  | N(14)-Mn(4)-O ( 1 2 ) | 86.09(10)  |
| N(9)-Mn(4)-O ( 1 2 )  | 84.04(10)  | N(13)-Mn(4)-O ( 1 2 ) | 80.68(10)  |
| O(6)-C(27)-O ( 5 )    | 126.4(3)   | O(8)-C(34)-O ( 7 )    | 122.9(3)   |

---
